# Supplementary material
Source: PubMed Central journal article supplement (PMC3523681)
Supplement: NIHMS422205-supplement-supplemental_data.pdf [file NIHMS422205-supplement-supplemental_data.pdf]

Online supplement

**Title:**

A TRIAL OF TWO STRATEGIES TO REDUCE NOCTURNAL BLOOD PRESSURE IN AFRICAN AMERICANS WITH CHRONIC KIDNEY DISEASE

**Authors names**

Mahboob Rahman,<sup>1</sup> Tom Greene,<sup>2</sup> Robert A Phillips,<sup>3</sup> Lawrence Y Agodoa,<sup>4</sup> George L Bakris,<sup>5</sup> Jeanne Charleston,<sup>6</sup> Gabriel Contreras,<sup>7</sup> Francis Gabbai,<sup>8</sup> Leena Hiremath,<sup>9</sup> Kenneth Jamerson,<sup>10</sup> Cynthia Kendrick,<sup>11</sup> John W Kusek,<sup>4</sup> James P Lash JP,<sup>12</sup> Janice Lea,<sup>13</sup> Edgar R Miller III,<sup>6</sup> Stephen Rostand,<sup>14</sup> Robert Toto,<sup>15</sup> Xulei Wang,<sup>11</sup> Jackson T Wright Jr,<sup>1</sup> Lawrence J Appel<sup>6</sup>

## ABPM methods

SpaceLabs Medical Model 90217 was used. ABP monitor Arm circumference was measured to ensure use of appropriate size cuff. The monitor recorded BP every 30 minutes. Written instructions for use of the device were provided to participants. Study participants also recorded in a diary the time they went to bed, the time they awoke, nap time during the course of the day, and the time they took their antihypertensive medication(s). The ABPM session was considered adequate if the device had been worn for a continuous 24 hour period and resulted in at least 14 acceptable readings between 6:00 a.m. and 12:00 a.m., and 7 acceptable readings between midnight to 6:00 a.m. Night was defined as the period of time from midnight to 6 AM, and day was defined as the period of time from 6 AM to midnight. Nondipping was defined by a  $\leq 10\%$  decrease in mean nighttime systolic BP; reverse dipping was defined by a higher nighttime than daytime systolic BP. Masked hypertension was defined as both daytime systolic blood pressure  $< 140\text{mmHg}$  and nighttime systolic blood pressure  $\geq 120\text{ mmHg}$
